# Supplementary material for: Genotyping by Genome Reducing and Sequencing for Outbred Animals
Source: PLoS One. 2013 Jul 18;8(7):e67500. doi: 10.1371/journal.pone.0067500 (PMC3715491; doi:10.1371/journal.pone.0067500)
Supplement: Table S2 — Genome location number. (XLS) [file pone.0067500.s006.xls]

## Sheet: genome location
number of unique fragments	barcode(individual)
40163	CGGTAGA
171472	TATTTTT
177707	AGTGGA
216119	TTCCTGGA
219700	CGCGGAGA
226793	TAGGCCAT
240371	GTAA
246593	TAACGA
256800	CCTAC
272730	TCGAAGA
273532	AACCGAGA
284342	CGTGTGGT
289619	TCTCAGTC
297536	AACGCCT
305237	GTCGATT
307685	ATGCCT
309211	GCTGTGGA
312972	GGATTGGT
313481	TGCGA
315494	ACGTGTT
323354	ACGACTAC
326743	ATGAAAC
333183	TTCAGA
335195	TCTGTGA
336153	GCTCTA
339892	CGCTGAT
340556	CCGGATAT
341017	GGAAC
345862	AATATGC
348298	TAGGAA
348393	ACCTAA
351303	GAGGA
353544	CGCTT
354926	GTCAA
355012	TGGCTA
355343	TCACC
355705	GCCAGT
362859	ATATGT
366466	AAAAGTT
367579	TAATA
368653	ATTAATT
372671	CCACAA
373896	GATC
374672	TACAT
375290	CTAGC
375976	CTATTA
376908	GTTGAA
377762	GAACTTC
378519	CCAGCT
380283	AGCCC
382928	ACAAA
383315	CTTGCTT
385258	GGTTGT
388728	AGGAT
390133	CATCGT
395054	CTGTA
395995	CTCC
396014	AGGC
397244	GGACCTA
397676	CGAT
400005	ATTGA
403947	TTCTC
404878	TGCA
409174	GAGATA
410840	GGTGT
416305	GTATT
421097	CATCT
429053	GCGT
430936	TCGTT
435552	TCAC
442483	AACT
447051	CAGA
343573	Average
71020.4	STD
0.206711	C.V
347846	Average except for special individual
61500.6	STD except for special individual
0.176804	C.V except for special individual
